# Supplementary material for: Monocyte, neutrophil, and whole blood transcriptome dynamics following ischemic stroke
Source: PubMed Central journal article supplement (PMC9942321; doi:10.1186/s12916-023-02766-1), 2023-02-20
Supplement: 12916_2023_2766_MOESM2_ESM.pdf [file 12916_2023_2766_MOESM2_ESM.pdf]

# Sup. Figure 1

**A**

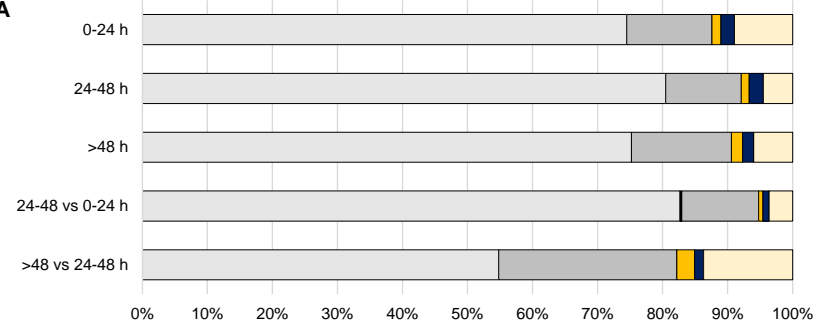

**B**

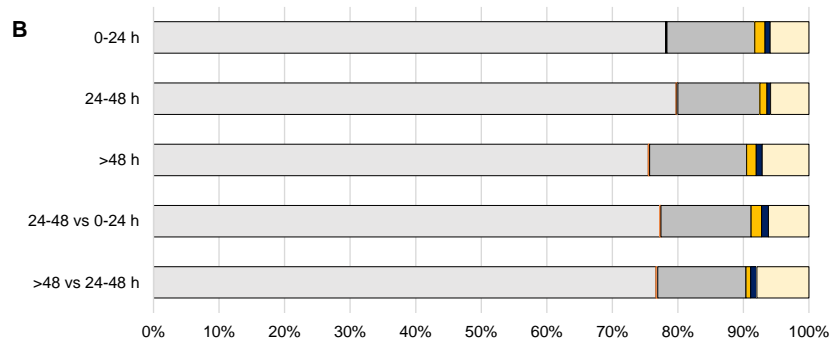

**C**

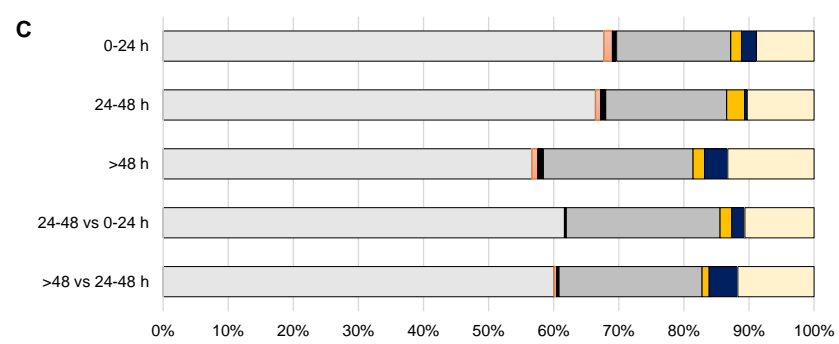

| Monocytes      | >48 vs 24-48 h | 24-48 vs 0-24 h | >48 h | 24-48 h | 0-24 h |
|----------------|----------------|-----------------|-------|---------|--------|
| Protein Coding | 54.8           | 82.7            | 75.0  | 80.5    | 74.5   |
| Ig             | 0.0            | 0.0             | 0.0   | 0.0     | 0.0    |
| TcR            | 0.0            | 0.3             | 0.0   | 0.0     | 0.0    |
| lncRNA         | 27.4           | 11.8            | 15.3  | 11.6    | 13.1   |
| Non-coding RNA | 2.7            | 0.7             | 1.7   | 1.2     | 1.4    |
| TEC            | 1.4            | 0.9             | 1.7   | 2.2     | 2.1    |
| Pseudogene     | 13.7           | 3.6             | 6.0   | 4.5     | 9.0    |

| Neutrophils    | >48 vs 24-48 h | 24-48 vs 0-24 h | >48 h | 24-48 h | 0-24 h |
|----------------|----------------|-----------------|-------|---------|--------|
| Protein Coding | 76.7           | 77.1            | 75.5  | 78.7    | 78.1   |
| Ig             | 0.2            | 0.2             | 0.2   | 0.1     | 0.0    |
| TcR            | 0.0            | 0.0             | 0.0   | 0.1     | 0.2    |
| lncRNA         | 13.5           | 13.7            | 14.8  | 12.3    | 13.4   |
| Non-coding RNA | 0.7            | 1.6             | 1.5   | 1.1     | 1.6    |
| TEC            | 1.0            | 1.1             | 0.9   | 0.5     | 0.8    |
| Pseudogene     | 7.9            | 6.2             | 7.1   | 5.8     | 5.9    |

| Whole Blood    | >48 vs 24-48 h | 24-48 vs 0-24 h | >48 h | 24-48 h | 0-24 h |
|----------------|----------------|-----------------|-------|---------|--------|
| Protein Coding | 60.1           | 61.7            | 56.4  | 64.6    | 67.7   |
| Ig             | 0.4            | 0.0             | 0.9   | 0.8     | 1.3    |
| TcR            | 0.4            | 0.3             | 0.9   | 0.8     | 0.7    |
| lncRNA         | 22.0           | 23.6            | 22.9  | 18.1    | 17.5   |
| Non-coding RNA | 1.1            | 1.8             | 1.8   | 2.7     | 1.6    |
| TEC            | 4.4            | 2.1             | 3.5   | 0.4     | 2.3    |
| Pseudogene     | 11.7           | 10.6            | 13.2  | 10.0    | 8.9    |

# Sup. Figure 2

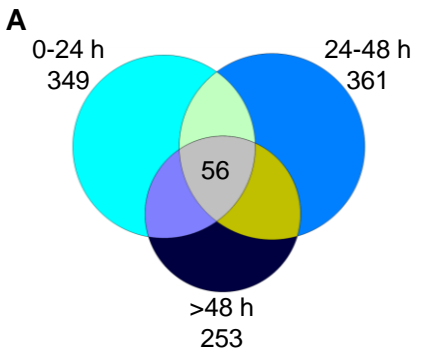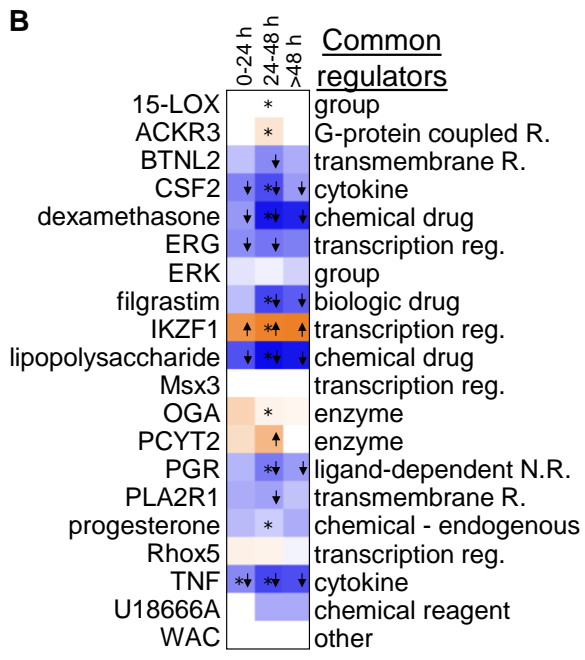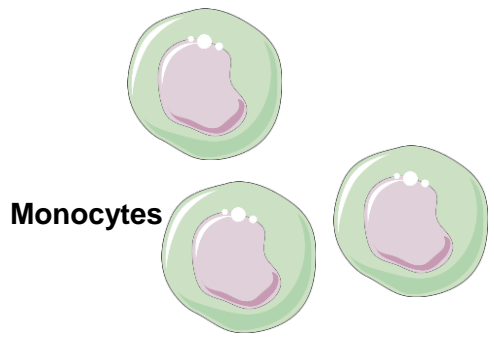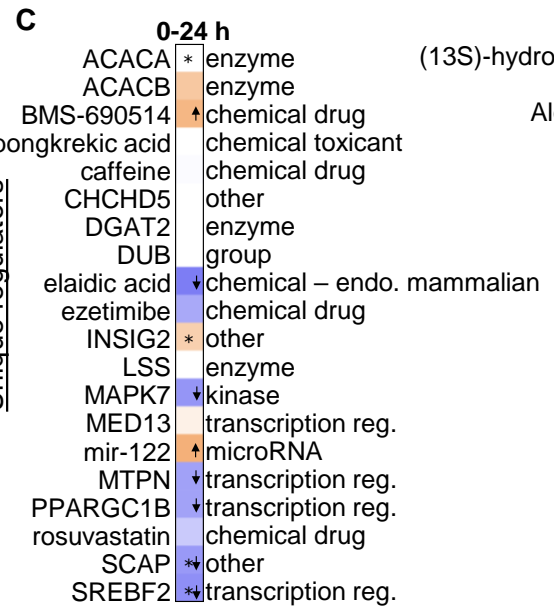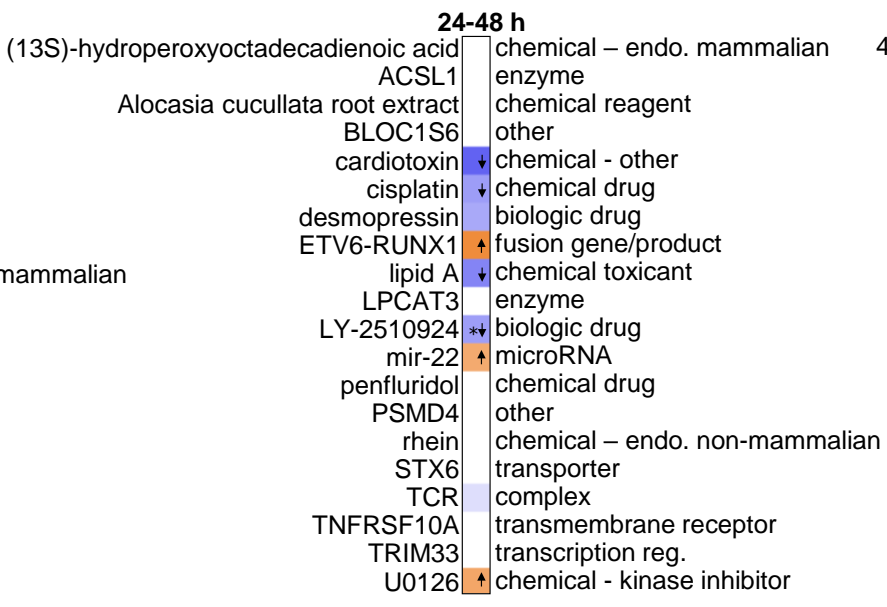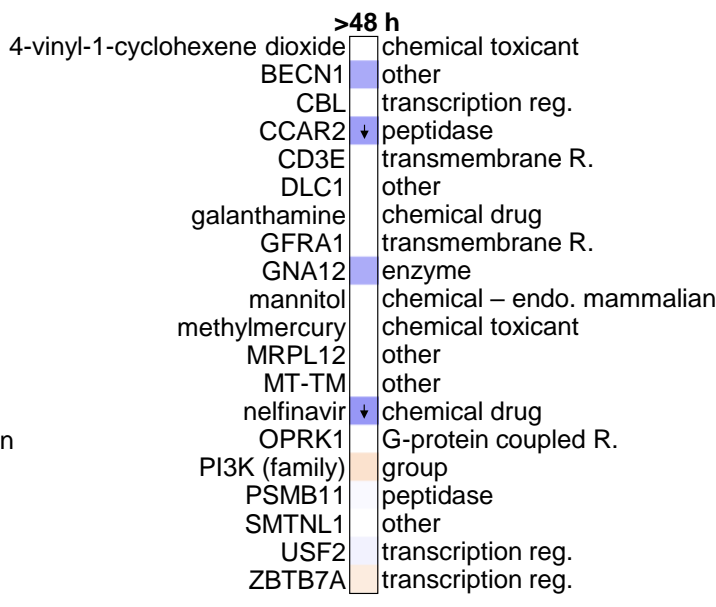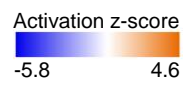

# Sup. Figure 3

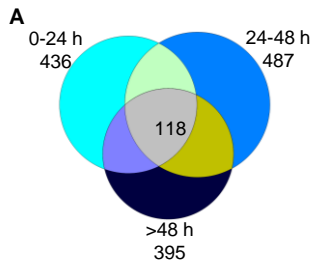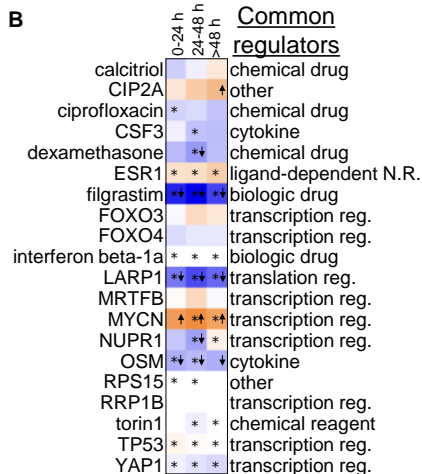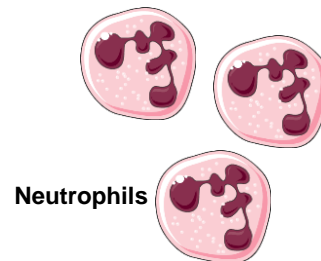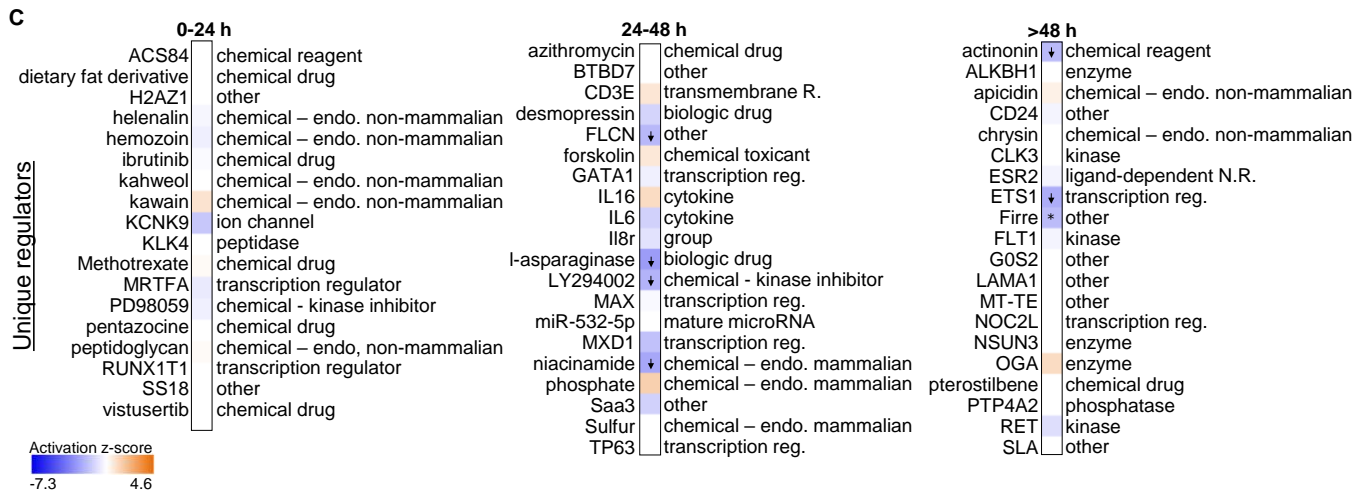

# Sup. Figure 4

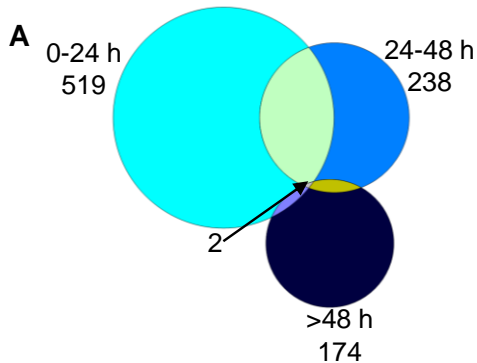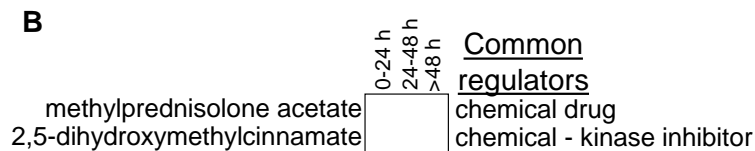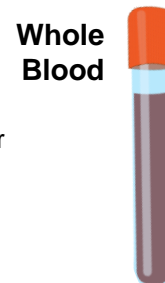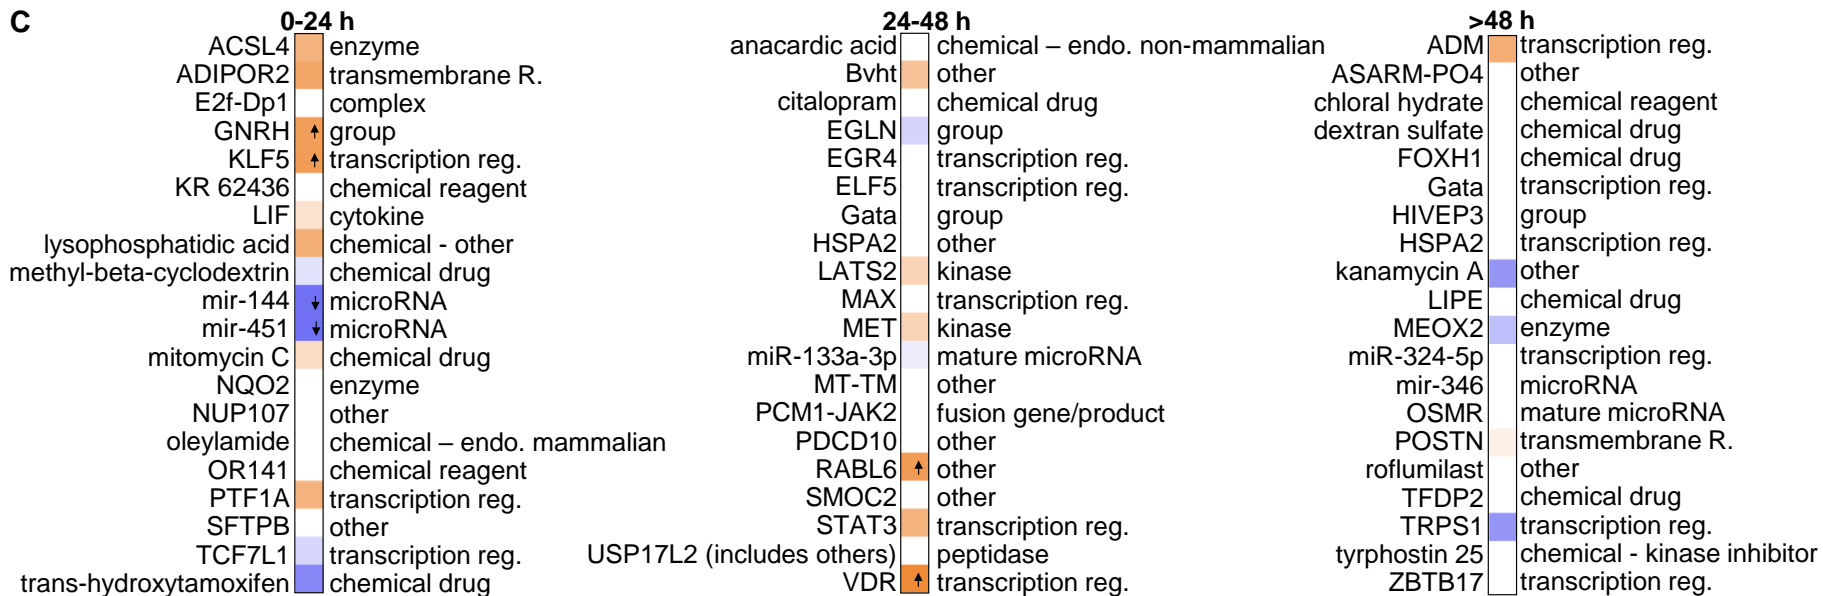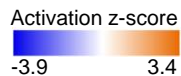

Sup. Figure 5 A

| Subject             | Sex    | IS cause | Age At Onset | Time since event (h) |
|---------------------|--------|----------|--------------|----------------------|
| tPA1 (MON, WB)      | Male   | SV       | 67           | 6.4                  |
| tPA2 (MON, NEU, WB) | Male   | SV       | 84           | 13                   |
| tPA3 (MON, NEU, WB) | Male   | LV       | 76           | 20.4                 |
| tPA4 (MON, NEU)     | Male   | SV       | 43           | 25.5                 |
| tPA5 (MON, WB)      | Female | LV       | 62           | 58.3                 |

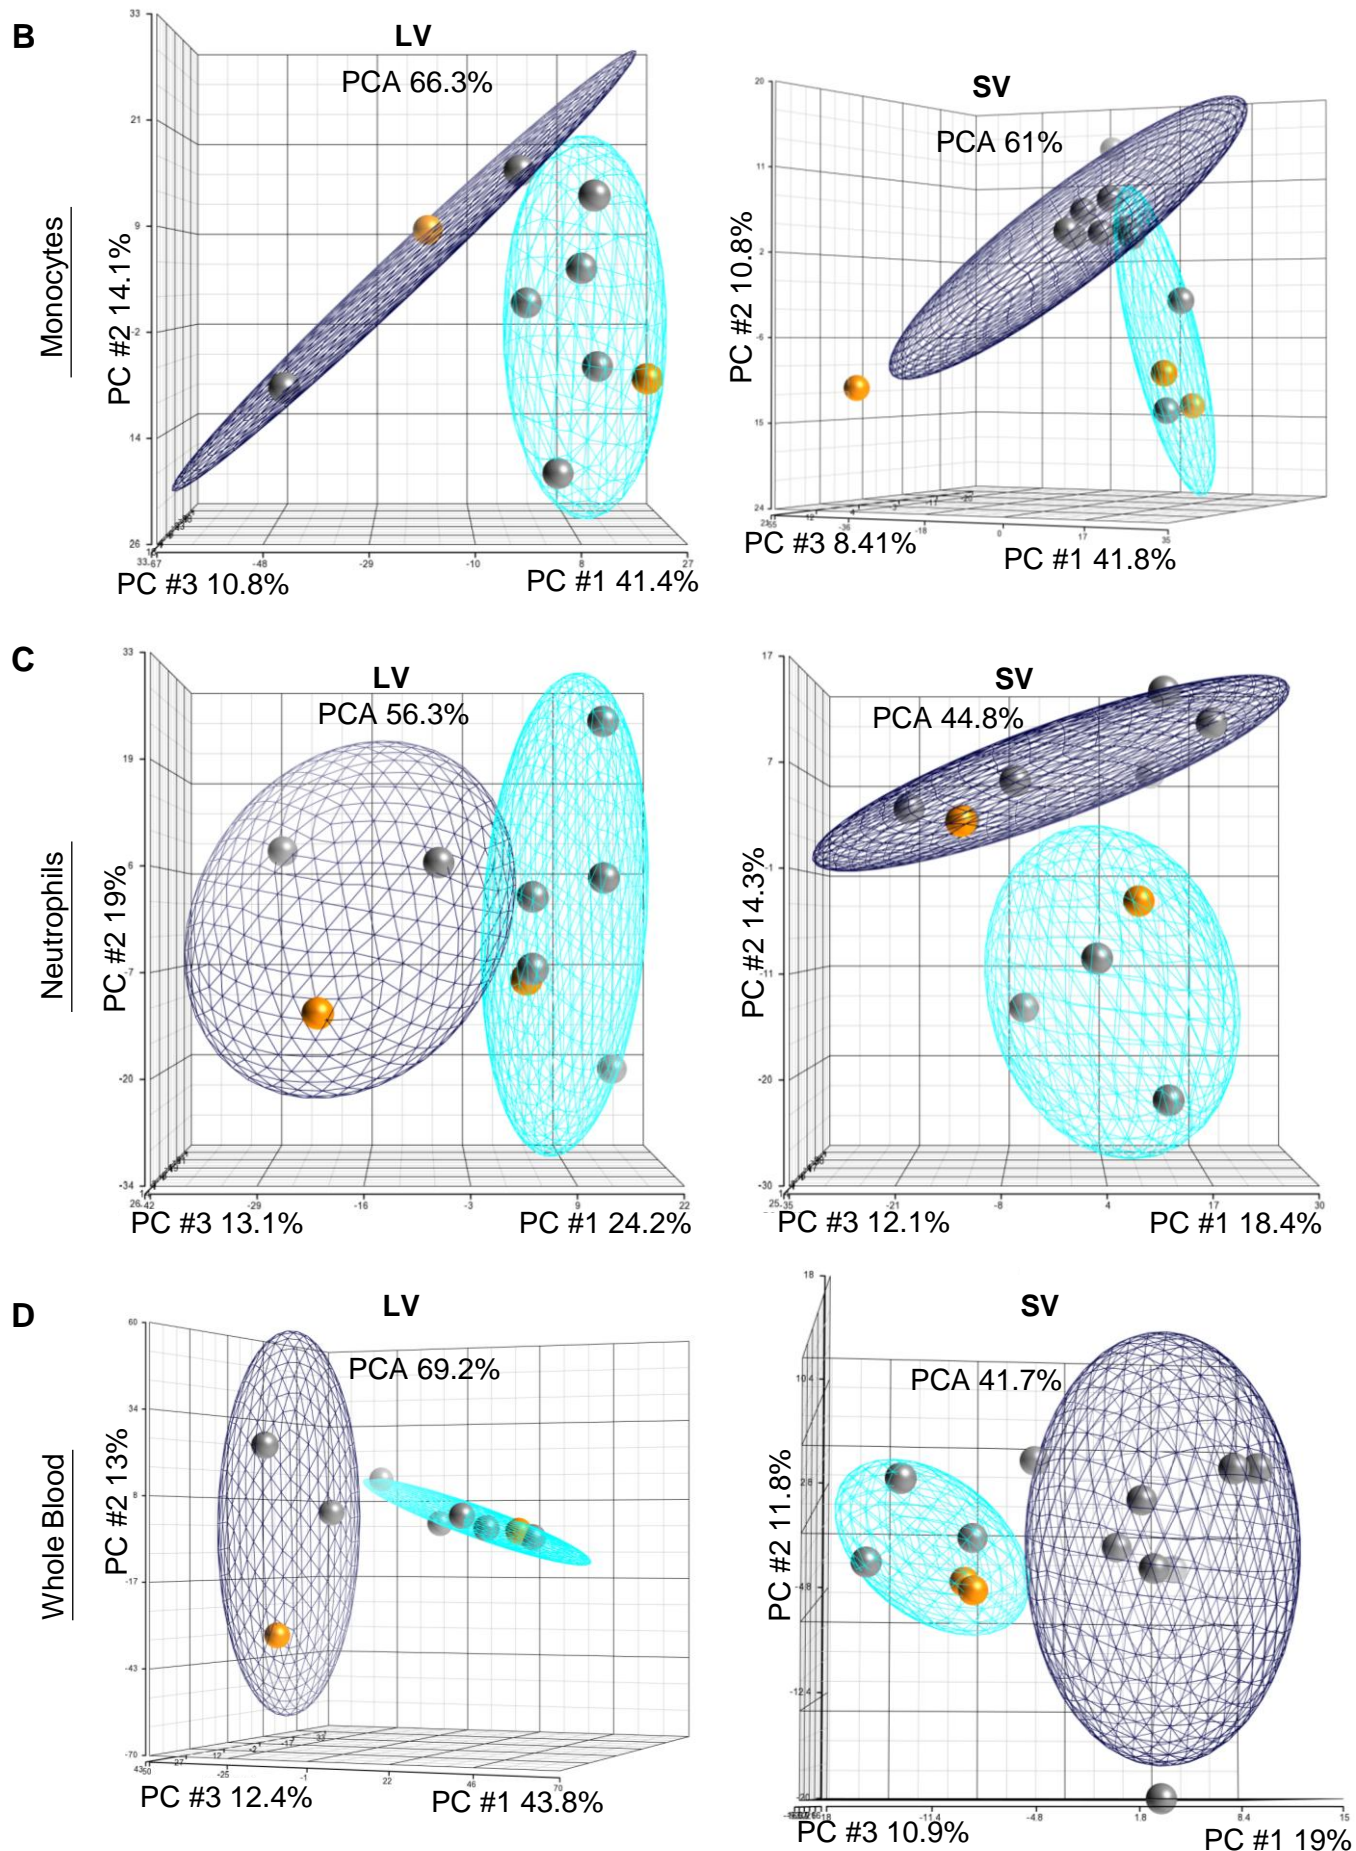

■ 0-24 h 
 ■ >24 h 
 ■ tPA 
 ■ No tPA

# Sup. Figure 6

**A**

Monocytes

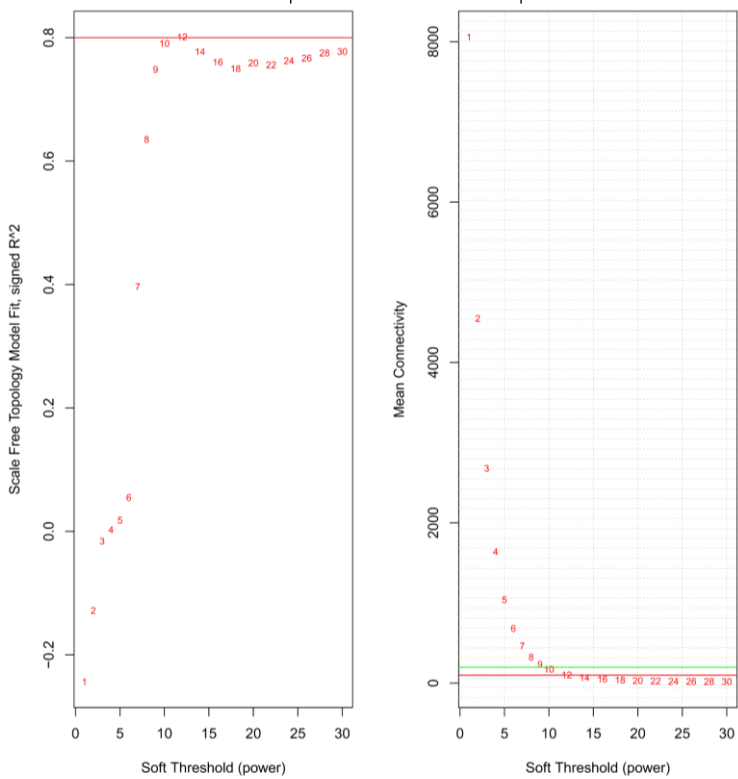

**B**

Neutrophils

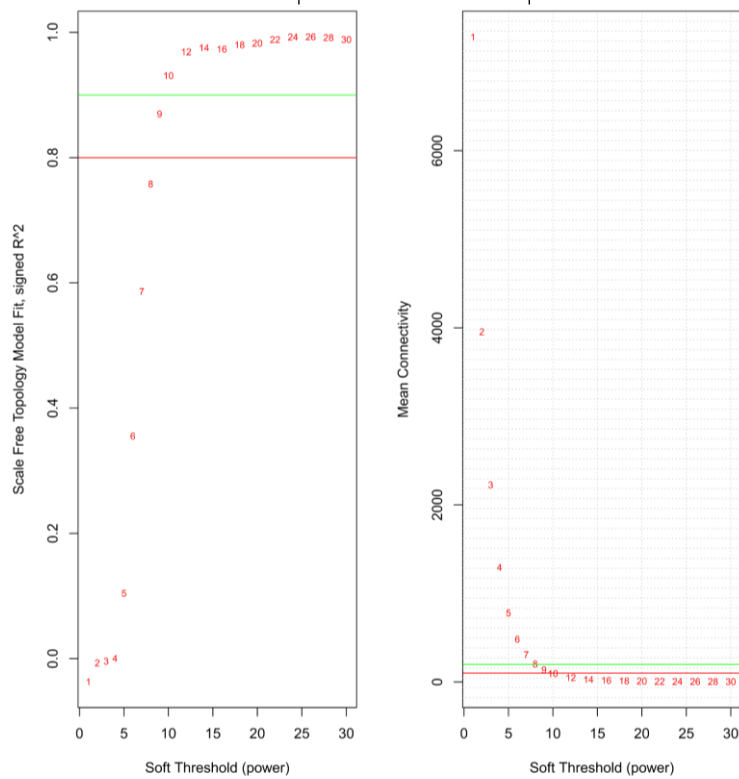

**C**

Whole Blood

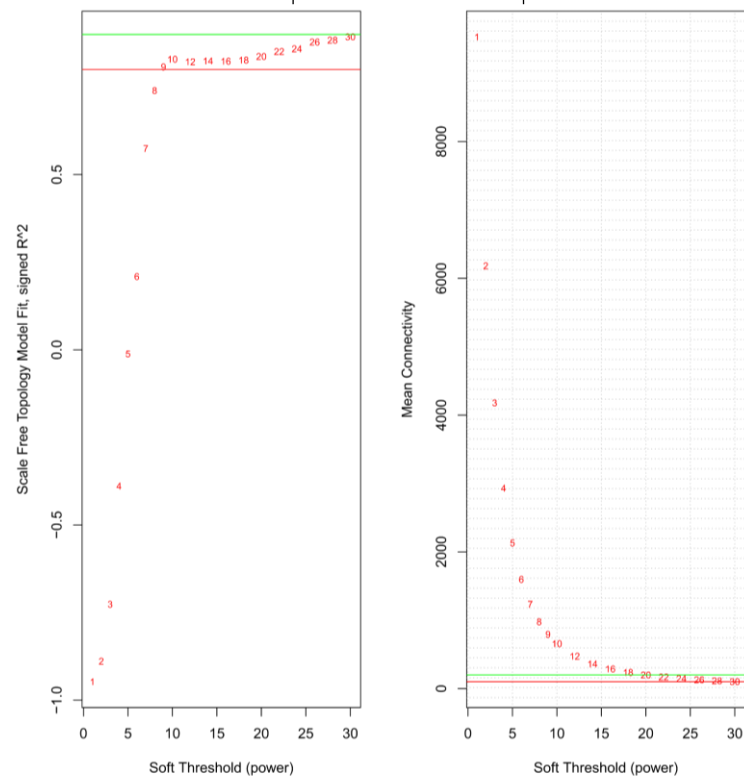

# Sup. Figure 7

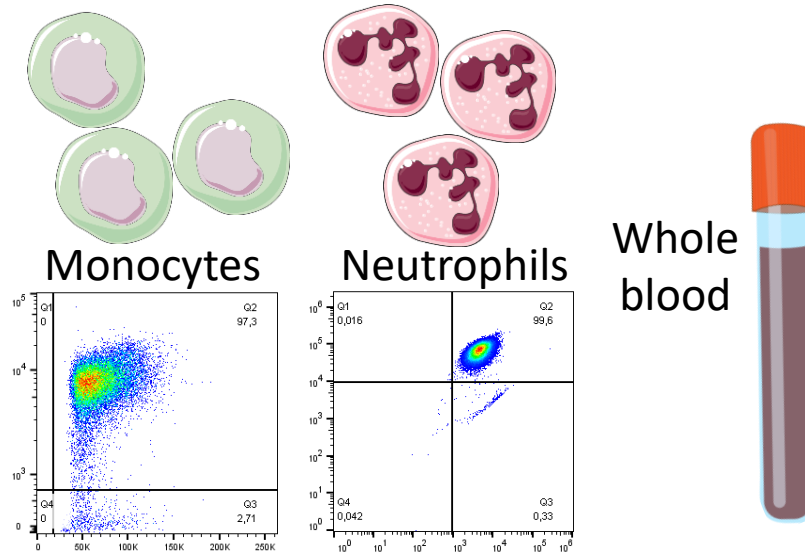

Transcriptome dynamics

Differential expression

Co-expression networks

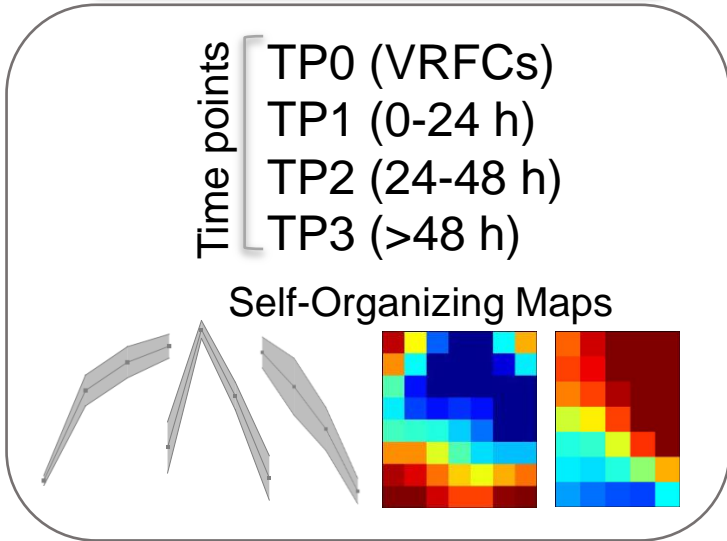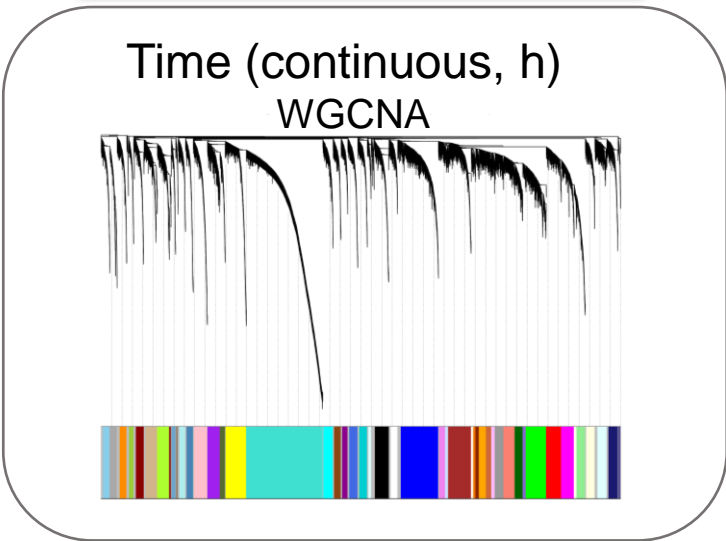

Key genes and pathways associated with time after ischemic stroke
